# Supplementary material
Source: Springer Nature journal article supplement (https://www.springermedizin.de/resource/supplementary/12875_2013_1190_MOESM1_ESM.pdf/9435562)

**Annex I. ILLUSTRATIONS AND FIGURES**

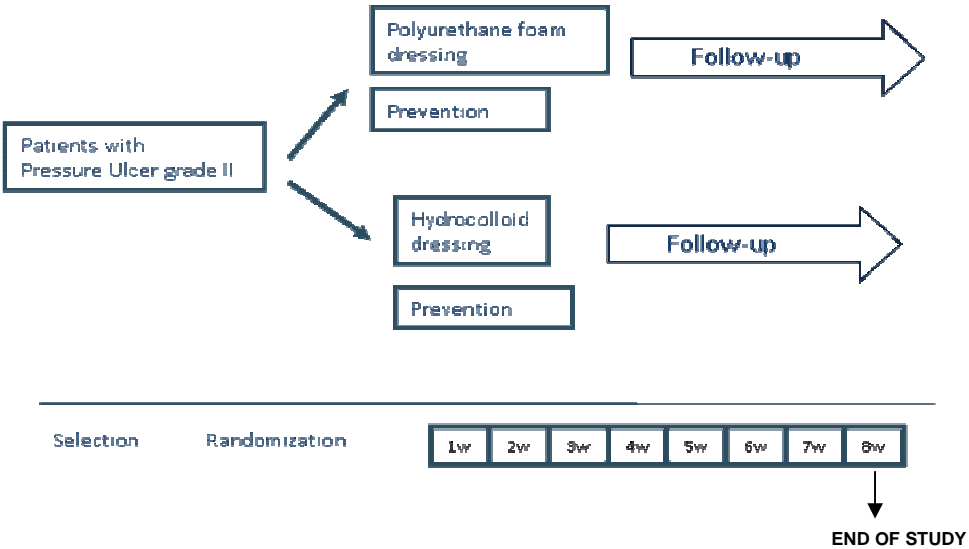

Supplement: MOESM1 [file 9435562]
